# Supplementary material
Source: publisher figshare collection journal article supplement (https://diabetesjournals.figshare.com/ndownloader/files/27996354)
Supplement: Supplementary file 1 [file 27996354]

## **SUPPLEMENTARY MATERIAL**

**Supplemental Table S1: Demographic and obstetric characteristics of the study group**

| <b>Characteristic</b>                             | <b>Value</b>     |
|---------------------------------------------------|------------------|
| N                                                 | 55,361           |
| Maternal Age (years, mean $\pm$ SD)               | 30.55 $\pm$ 4.84 |
| $\geq 35$ years (n [%])                           | 10,553 (19.1%)   |
| <i>Ethnicity (n [%])</i>                          |                  |
| South Asian                                       | 3,873 (7.0%)     |
| Chinese                                           | 6,075 (11.0%)    |
| Caucasian and other                               | 45,413 (82.0%)   |
| <i>Income quantile (n [%])</i>                    |                  |
| Quintile 1 (lowest)                               | 11,241 (20.3%)   |
| Quintile 2                                        | 12,041 (21.8%)   |
| Quintile 3                                        | 11,920 (21.6%)   |
| Quintile 4                                        | 11,855 (21.5%)   |
| Quintile 5 (highest)                              | 8,191 (14.8%)    |
| <i>Rurality (n [%])</i>                           |                  |
| Rural                                             | 1,318 (2.4%)     |
| Semi-urban                                        | 6,936 (12.6%)    |
| Urban                                             | 46,897 (85.0%)   |
| Missing                                           |                  |
| Pre-existing hypertension                         | 1,404 (2.5%)     |
| Gestational age at birth (weeks, mean $\pm$ SD)   |                  |
| < 37 weeks (n [%])                                | 3,878 (7.0%)     |
| < 34 weeks (n [%])                                | 767 (1.4%)       |
| Preeclampsia (n [%])                              | 4,825 (8.7%)     |
| Female infant sex (n [%])                         | 26,908 (48.6%)   |
| Birth weight (g, mean $\pm$ SD)                   |                  |
| <10 <sup>th</sup> percentile <sup>a</sup> (n [%]) | 6,302 (11.4%)    |
| >90 <sup>th</sup> percentile <sup>a</sup> (n [%]) | 4,947 (8.9%)     |
| <i>OGTT characteristics</i>                       |                  |
| Gestational week at testing (mean $\pm$ SD)       | 27.5 $\pm$ 1.7   |
| Fasting value (mmol/L, mean $\pm$ SD)             | 4.47 $\pm$ 0.57  |
| 1-hour value (mmol/L, mean $\pm$ SD)              | 8.80 $\pm$ 1.84  |
| 2-hour value (mmol/L, mean $\pm$ SD)              | 7.22 $\pm$ 1.70  |

OGTT, 2-hour 75g-oral glucose tolerance test.

<sup>a</sup> Using a singleton-based Canadian growth chart for Kramer et al.

**Supplemental Table S2: Risk of future type-2 diabetes by number and type of abnormal OGTT values at 5-years post the index pregnancy**

| Number and type of abnormal OGTT values          | Proportion of women with OGTT abnormality (n [%]) | Proportion of women with type-2 diabetes at 5 years post index pregnancy (% [95%-CI]) | Risk of type-2 diabetes at 5-years post index pregnancy women meeting the criteria compared with women without GDM (0 abnormal values) |                                              |
|--------------------------------------------------|---------------------------------------------------|---------------------------------------------------------------------------------------|----------------------------------------------------------------------------------------------------------------------------------------|----------------------------------------------|
|                                                  |                                                   |                                                                                       | Crude relative risk (95%-CI)                                                                                                           | Adjusted relative risk <sup>a</sup> (95%-CI) |
| <b>2013 DC criteria</b>                          |                                                   |                                                                                       |                                                                                                                                        |                                              |
| 0 abnormal values                                | 41,507 (75.0%)                                    | 0.86% (0.77%, 0.94%)                                                                  | Referent                                                                                                                               | Referent                                     |
| ≥1 abnormal values (GDM)                         | 13854 (25.0%)                                     | 7.37% (6.93%, 7.80%)                                                                  | <b>8.62 (7.65, 9.71)</b>                                                                                                               | <b>8.58 (7.27, 10.11)</b>                    |
| 1 abnormal value                                 | 8202 (14.8%)                                      | 4.44% (3.99%, 4.88%)                                                                  | <b>5.19 (4.49, 5.99)</b>                                                                                                               | <b>5.15 (4.02, 6.60)</b>                     |
| 2 abnormal values                                | 4270 (7.7%)                                       | 8.78% (7.93%, 9.63%)                                                                  | <b>10.27 (8.91, 11.83)</b>                                                                                                             | <b>10.17 (8.77, 11.79)</b>                   |
| 3 abnormal values                                | 1382 (2.5%)                                       | 20.41% (18.28%, 22.53%)                                                               | <b>23.86 (20.60, 27.63)</b>                                                                                                            | <b>23.12 (20.34, 26.27)</b>                  |
| Fasting value abnormal (≥5.3 mmol/L [95 mg/dL])  | 4058 (7.2%)                                       | 12.67% (11.64%, 13.69%)                                                               | <b>14.81 (12.99, 16.89)</b>                                                                                                            | <b>14.36 (12.63, 16.33)</b>                  |
| 1-hour value abnormal (≥10.6 mmol [190 mg/dL])   | 8852 (15.7%)                                      | 9.06% (8.46%, 9.66%)                                                                  | <b>10.59 (9.37, 11.98)</b>                                                                                                             | <b>10.58 (9.12, 12.28)</b>                   |
| 2-hour value abnormal (≥ 9.0 mmol/L [162 mg/dL]) | 7978 (14.2%)                                      | 8.07% (7.47%, 8.67%)                                                                  | <b>9.44 (8.31, 10.72)</b>                                                                                                              | <b>9.46 (7.91, 11.31)</b>                    |
| <b>IADPSG criteria</b>                           |                                                   |                                                                                       |                                                                                                                                        |                                              |
| 0 abnormal values                                | 34,848 (62.9%)                                    | 0.70% (0.61%, 0.78%) <sup>b</sup>                                                     | Referent                                                                                                                               | Referent                                     |
| ≥1 abnormal values (GDM)                         | 20513 (37.1%)                                     | 5.52% (5.21%, 5.84%) <sup>c</sup>                                                     | <b>7.92 (6.90, 9.09)</b>                                                                                                               | <b>7.85 (6.45, 9.55)</b>                     |
| 1 abnormal value                                 | 10898 (19.7%)                                     | 2.59% (2.29%, 2.89%) <sup>c</sup>                                                     | <b>3.71 (3.13, 4.40)</b>                                                                                                               | <b>3.68 (2.90, 4.69)</b>                     |
| 2 abnormal values                                | 7194 (13.0%)                                      | 6.32% (5.76%, 6.89%) <sup>c</sup>                                                     | <b>9.07 (7.78, 10.58)</b>                                                                                                              | <b>9.08 (7.26, 11.35)</b>                    |
| 3 abnormal values                                | 2421 (4.4%)                                       | 16.36% (14.88%, 17.83%) <sup>d</sup>                                                  | <b>23.46 (20.10, 27.37)</b>                                                                                                            | <b>22.99 (19.02, 27.77)</b>                  |
| Fasting value abnormal (≥5.1 mmol/L [92 mg/dL])  | 6376 (11.3%)                                      | 9.94% (9.21%, 10.68%) <sup>c</sup>                                                    | <b>14.26 (12.33, 16.49)</b>                                                                                                            | <b>13.89 (11.82, 16.32)</b>                  |
| 1-hour value abnormal (≥10.0 mmol [180 mg/dL])   | 14238 (25.3%)                                     | 6.67% (6.26%, 7.08%) <sup>c</sup>                                                     | <b>9.57 (8.32, 11.00)</b>                                                                                                              | <b>9.52 (7.86, 11.52)</b>                    |
| 2-hour value abnormal (≥ 8.5 mmol/L [153 mg/dL]) | 11935 (21.2%)                                     | 6.67% (6.22%, 7.12%) <sup>c</sup>                                                     | <b>9.56 (8.30, 11.03)</b>                                                                                                              | <b>9.63 (7.75, 11.95)</b>                    |

CI, confidence interval; DC, Diabetes Canada; GDM, gestational diabetes mellitus; IADPSG, International Association of Diabetes and Pregnancy Study Groups; OGTT, 2-hour-75g-oral glucose tolerance test.

<sup>a</sup> Values reflect the results of modified Poisson regression analysis using women without GDM (0 abnormal values) as referent, and adjusted for the following variables: maternal age at the time of index birth, ethnicity, income quintile, and fetal sex. Significant associations are emphasized in bold font.

<sup>b</sup>  $p=0.014$  for the comparison of this incidence rate with the incidence rate associated with the corresponding predictor under the 2013 DC criteria

<sup>c</sup>  $p<0.001$  for the comparison of this incidence rate with the incidence rate associated with the corresponding predictor under the 2013 DC criteria

<sup>d</sup>  $p=0.002$  for the comparison of this incidence rate with the incidence rate associated with the corresponding predictor under the 2013 DC criteria
